# Supplementary material for: Spectral and kinetic manifestations of chain flexibility and polarity in the reversible photoisomerization of spironaphthoxazine-based acrylic copolymers
Source: Royal Society of Chemistry journal article supplement (doi:10.1039/d0nj06275h), 2021-01-01
Supplement: d0nj06275h1.pdf [file d0nj06275h1.pdf]

## SUPPORTING INFORMATION

### Spectral and kinetic manifestations of chain flexibility and polarity in reversible photoisomerization of spironaphthoxazine-based acrylic copolymers

Vahid Hamrang, Ali Reza Mahdavian\*

Polymer Science Department, Iran Polymer & Petrochemical Institute, P.O. Box: 14965/115, Tehran, Iran.

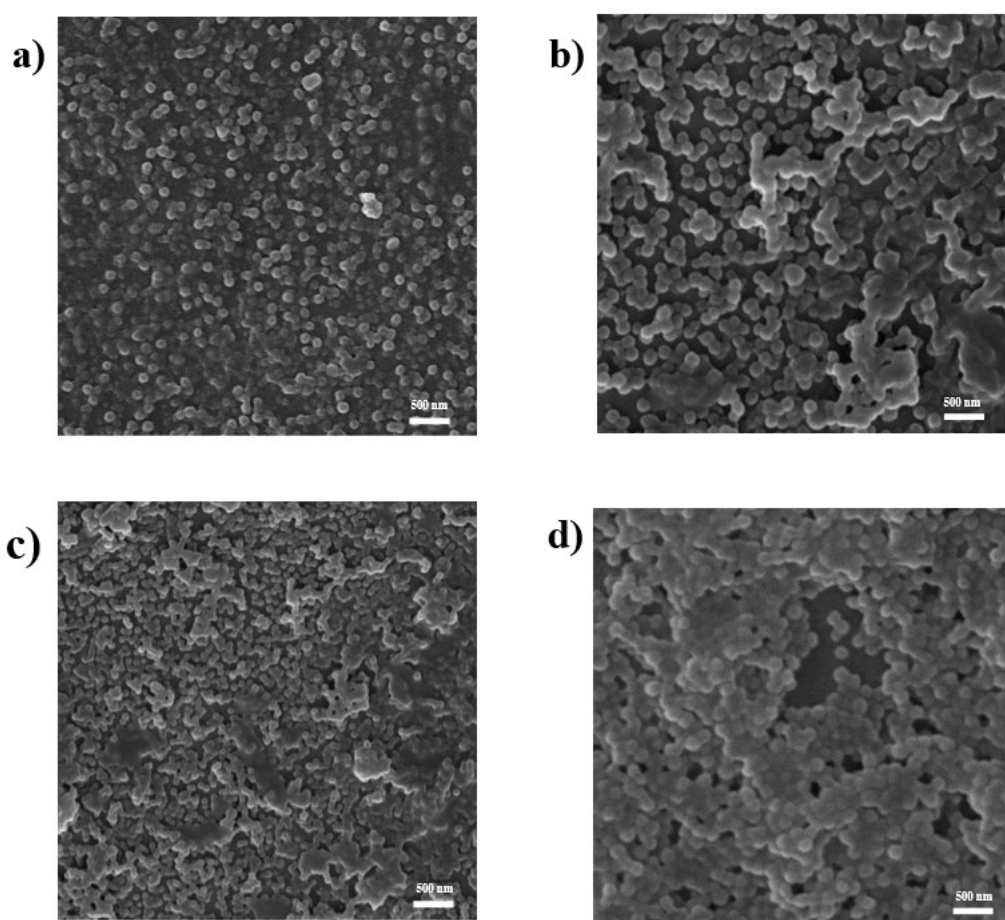

**Figure 1S.** SEM micrographs of the prepared (a) M10E0S, (b) M6E4S, (c) M2E8S and (d) M0E10S latexes

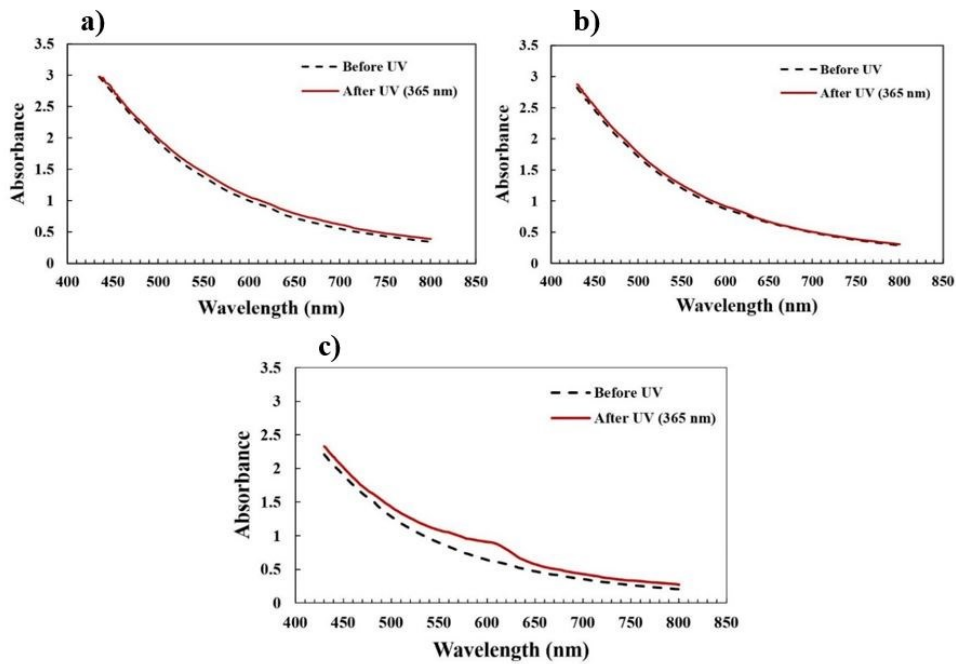

Figure 2S. UV-Vis spectra before (---) and after 30 s irradiation (—) at 365 nm and 5°C for M10E0S (a), M6E4S (b) and M2E8S (c) diluted latexes to 0.5 wt%

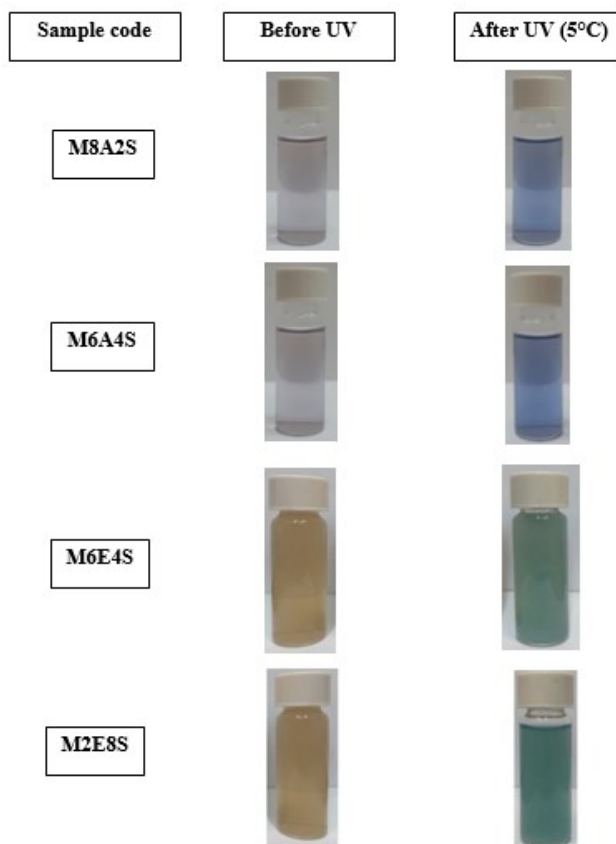

Figure 3S. Images of some typical solutions and miniemulsion samples before and after UV irradiation (5 °C)

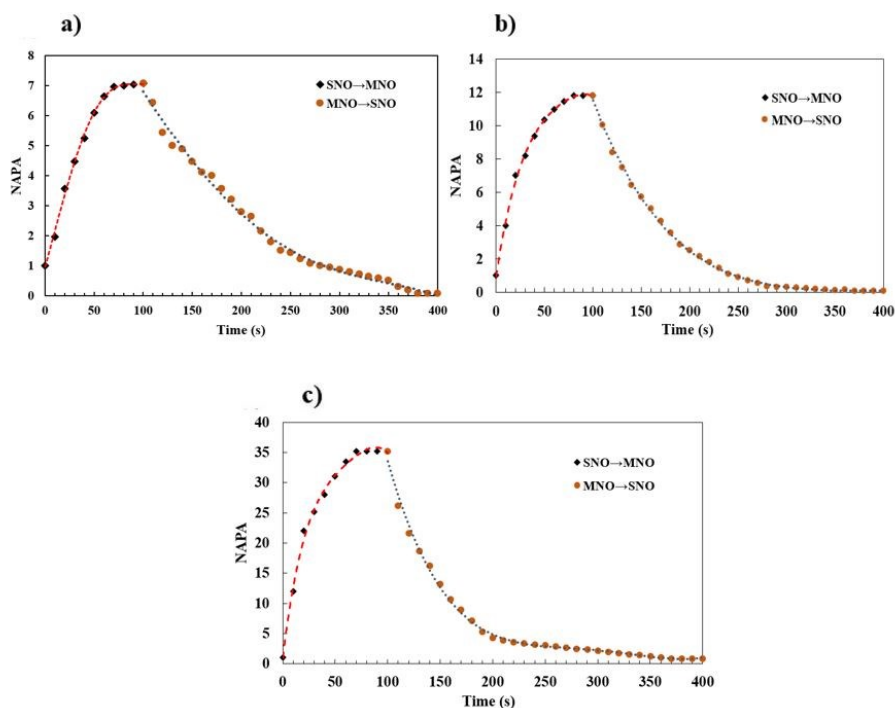

Figure 4S. Normalized absorbance peak area (◆ and●) and exponential fitting (--- and.....) curves for the kinetic of  $\text{SNO} \rightleftharpoons \text{MNO}$  photoisomerization in the prepared M-series latexes at the corresponding  $\lambda_{\text{max}}$  under UV (365 nm) and visible irradiations for (a) M10E0S, (b) M6E4S and (c) M2E8S

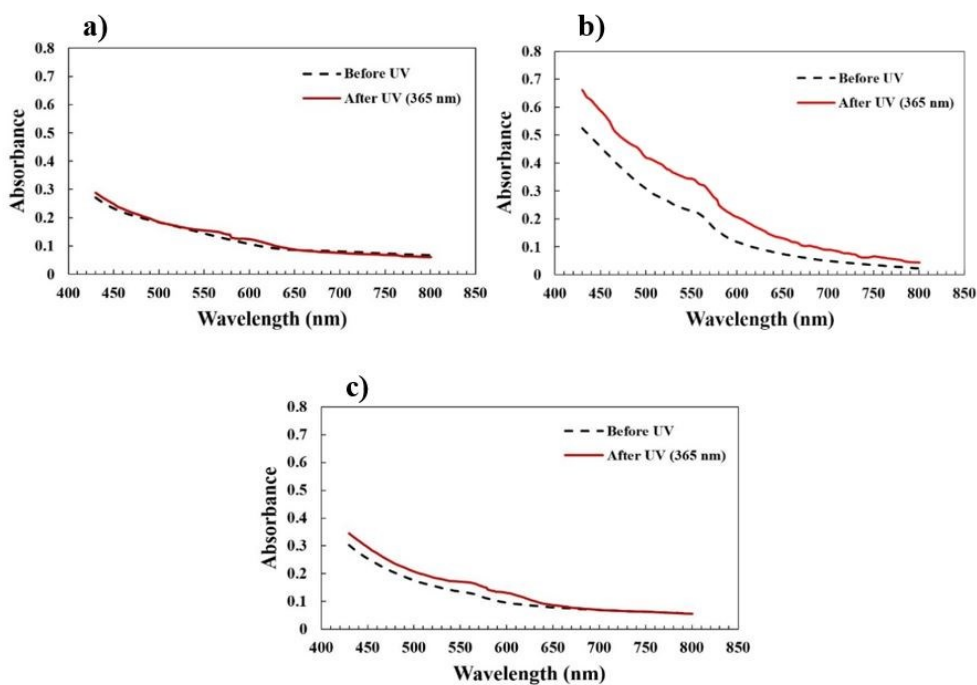

Figure 5S. UV-Vis spectra before (---) and after 30 s irradiation(—) at 365 nm and 5°C for (a) M10A0S, (b) M9A1S and (c) M7A3S solutions in MEK ( $10^{-4}$  M)

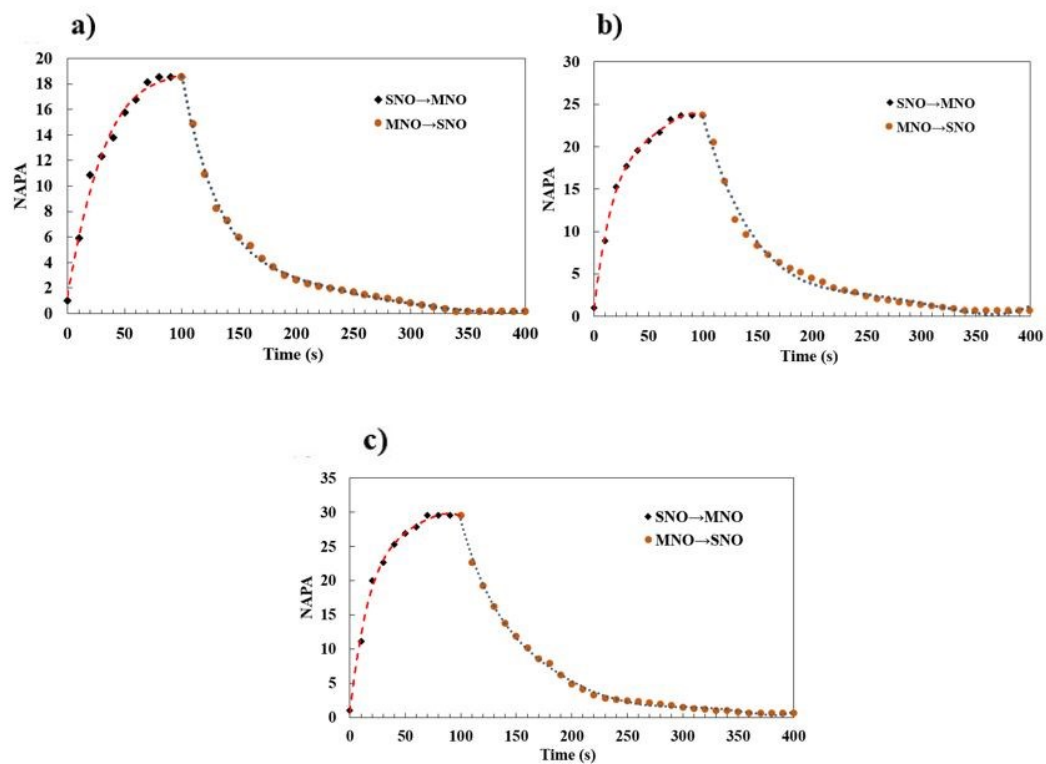

**Figure 6S. Normalized absorbance peak area (◆and●) and exponential fitting (---and.....) curves for the kinetic of SNO  $\rightleftharpoons$  MNO photoisomerization in the prepared S-series solutions at the corresponding  $\lambda_{\text{max}}$  under UV (365 nm) and visible irradiations for (a) M10A0S, (b) M9A1S and (c) M7A3S**
